# Supplementary material for: Increase of Akkermansia muciniphila by a Diet Containing Japanese Traditional Medicine Bofutsushosan in a Mouse Model of Non-Alcoholic Fatty Liver Disease
Source: PubMed Central journal article supplement (PMC7146306; doi:10.3390/nu12030839), 2020-03-20
Supplement: nutrients-12-00839-s001.pdf [file nutrients-12-00839-s001.pdf]

**Table S1.** Components of Bofutsushosan and their reported biological activities.

| <b>Crude drug</b>                                                           | <b>Reported biological activity</b>                      | <b>ref</b> |
|-----------------------------------------------------------------------------|----------------------------------------------------------|------------|
| Angelicae Radix                                                             | Anti-obesity in HFD mice                                 | 65         |
| Paeoniae Radix                                                              | Anti-obesity and effect on microbiota in HFD mice        | 66         |
| Cnidii Rhizoma                                                              | None                                                     |            |
| Gardeniae Fructus                                                           | Anti-hyperglycemia and anti-obesity in STZ diabetic mice | 67         |
| Forsythiae Fructus                                                          | None                                                     |            |
| Menthae Herba                                                               | None                                                     |            |
| Zingiberis Rhizoma                                                          | GLUT5 inhibition                                         | 68         |
| Schizonepetae Spica                                                         | Cholesterol uptake inhibition into Caco-2 cells          | 69         |
| Saposhnikoviae Radix                                                        | None                                                     |            |
| Saposhnikoviae Radix                                                        | GLUT5 inhibition                                         | 66         |
| Ephedrae Herba                                                              | Anti-obesity                                             | 70         |
| Rhei Rhizoma                                                                | Suppression of differentiation of 3T3-L1 cells           | 71         |
| Natrium Sulfricum                                                           | None                                                     |            |
| Atractylodis Rhizoma                                                        | Anti-obesity in HFD rat with LPS                         | 51         |
| Platycodi Radix                                                             | Anti-obesity by activating AMPK in db/db mice            | 72         |
| Scutellariae Radix                                                          | Anti-obesity in db/db mice                               | 73         |
| Glycyrrhizae Radix                                                          | None                                                     |            |
| Gypsum                                                                      | None                                                     |            |
| Kasseki (mainly composed of aluminium silicate hydrate and silicon dioxide) | None                                                     |            |

ref, references

**Table S2.** Relative abundance of microbiota (genus level) in mice (7 week-old, no treatment).

| Phylum                 | Genus                                                 | C57BL/6J (%)<br>Mean ± SD. | ob/ob (%)<br>Mean ± SD | Ratio              | p-value |
|------------------------|-------------------------------------------------------|----------------------------|------------------------|--------------------|---------|
| <i>Verrucomicrobia</i> | <i>Akkermansia</i>                                    | 0.04 ± 0.04                | <0.001                 | 0.08               | 0.040   |
| <i>Unassigned</i>      | Unassigned                                            | 0.31 ± 0.09                | 0.10 ± 0.04            | 0.33               | 0.002   |
|                        | <i>Parabacteroides</i>                                | 0.11 ± 0.10                | <b>2.37 ± 1.76</b>     | <b><u>1.73</u></b> | 0.002   |
| <i>Bacteroidetes</i>   | unknown genus in family<br><i>Rikenellaceae</i>       | 0.56 ± 1.06                | <0.001                 | 0.00               | 0.017   |
| <i>Cyanobacteria</i>   | unknown genus in order<br><i>Streptophyta</i>         | BLD                        | 0.01 ± 0.01            | .127               | 0.028   |
|                        | <i>Turicibacter</i>                                   | 0.10 ± 0.06                | BLD                    | 0.00               | 0.003   |
| <i>Firmicutes</i>      | unknown genus in order<br><i>Clostridiales</i>        | 0.48 ± 0.37                | 0.04 ± 0.08            | 0.09               | 0.008   |
|                        | unknown genus in family<br><i>Clostridiaceae</i>      | 0.08 ± 0.03                | BLD                    | 0.00               | 0.003   |
|                        | <i>Coprococcus</i>                                    | 0.84 ± 0.36                | 0.13 ± 0.14            | 0.15               | 0.008   |
|                        | <i>Dorea</i>                                          | 0.14 ± 0.08                | 0.03 ± 0.05            | 0.20               | 0.029   |
|                        | <i>[Ruminococcus]</i>                                 | 0.24 ± 0.09                | 0.10 ± 0.09            | 0.44               | 0.045   |
|                        | unknown genus in family<br><i>Erysipelotrichaceae</i> | 0.04 ± 0.02                | 0.15 ± 0.08            | 3.94               | 0.015   |

Genera that showed a significant difference between C57B/6J and ob/ob mice by Mann-Whitney *U* (MWU) test ( $p < 0.05$ ,  $n = 6$ ) are listed. When genus could not be detected, abundance value was provisionally assigned as 0.001%. Ratio was calculated as ob/ob group / C57BL/6J group. BLD, below limit of detection in all samples; bold, relative abundance >1%; underlined bold, ratio was >10 or <0.1 and relative abundance was >1%.

**Table S3.** Relative abundance of microbiota (genus level) in ob/ob mice (one week on dietary administration of 5% BTS).

| Phylum                 | Genus                                                  | CONT group (%)<br>Mean $\pm$ SD   | BTS group (%)<br>Mean $\pm$ SD    | Ratio                 | <i>p</i> -value |
|------------------------|--------------------------------------------------------|-----------------------------------|-----------------------------------|-----------------------|-----------------|
| <i>Verrucomicrobia</i> | <i>Akkermansia</i>                                     | BLD                               | <b>3.17 <math>\pm</math> 1.59</b> | <b><u>3165.07</u></b> | 0.003           |
| <i>Bacteroidetes</i>   | <i>Bacteroides</i>                                     | <b>1.30 <math>\pm</math> 0.77</b> | <b>8.56 <math>\pm</math> 7.71</b> | 6.57                  | 0.002           |
|                        | <i>Prevotella</i>                                      | <b>7.33 <math>\pm</math> 4.64</b> | <b>1.28 <math>\pm</math> 0.81</b> | 0.18                  | 0.009           |
| <i>Firmicutes</i>      | <i>Coprococcus</i>                                     | 0.08 $\pm$ 0.09                   | 0.58 $\pm$ 0.32                   | 7.04                  | 0.008           |
|                        | [ <i>Ruminococcus</i> ]                                | 0.10 $\pm$ 0.12                   | 0.38 $\pm$ 0.21                   | 3.86                  | 0.012           |
|                        | <i>Anaerotruncus</i>                                   | BLD                               | 0.02 $\pm$ 0.02                   | 20.16                 | 0.010           |
|                        | unknown genus in family<br>[ <i>Mogibacteriaceae</i> ] | 0.01 $\pm$ 0.02                   | 0.06 $\pm$ 0.05                   | 4.16                  | 0.042           |
| <i>Proteobacteria</i>  | Unknown genus of family<br><i>Enterobacteriaceae</i>   | 0.22 $\pm$ 0.53                   | <b>2.35 <math>\pm</math> 3.39</b> | <b><u>10.81</u></b>   | 0.025           |
| <i>Tenericutes</i>     | Unknown genus of order <i>RF39</i>                     | 0.43 $\pm$ 0.47                   | 0.04 $\pm$ 0.04                   | 0.10                  | 0.026           |

Bacterial alteration by BTS administration for 1 week was investigated. Genera that showed significant difference between CONT and BTS groups by Mann-Whitney *U* (MWU) test ( $p < 0.05$ ,  $n = 6$ ) are listed. When genus could not be detected, abundance value was provisionally assigned as 0.001%. Ratio was calculated as BTS group / CONT group. BLD, below limit of detection in all samples; bold, relative abundance  $>1\%$ ; underlined bold, ratio was  $>10$  or  $<0.1$  and relative abundance was  $>1\%$ .

**Table S4.** Relative abundance of microbiota (genus level) in ob/ob mice (two weeks on dietary administration of 5% BTS).

| Phylum                 | Genus                                                 | CONT group (%)<br>Mean $\pm$ SD    | BTS group (%)<br>Mean $\pm$ SD      | Ratio                | <i>p</i> -value |
|------------------------|-------------------------------------------------------|------------------------------------|-------------------------------------|----------------------|-----------------|
| <i>Verrucomicrobia</i> | <i>Akkermansia</i>                                    | 0.01 $\pm$ 0.02                    | <b>4.16 <math>\pm</math> 2.40</b>   | <b><u>277.51</u></b> | 0.019           |
|                        | <i>Bacteroides</i>                                    | <b>1.06 <math>\pm</math> 1.45</b>  | <b>5.87 <math>\pm</math> 4.04</b>   | 5.56                 | 0.009           |
| <i>Bacteroidetes</i>   | <i>Parabacteroides</i>                                | <b>4.09 <math>\pm</math> 2.23</b>  | <b>18.64 <math>\pm</math> 9.60</b>  | 4.56                 | 0.002           |
|                        | <i>Prevotella</i>                                     | <b>4.21 <math>\pm</math> 2.23</b>  | <b>1.55 <math>\pm</math> 0.63</b>   | 0.37                 | 0.015           |
|                        | unknown genus in order<br><i>Clostridiales</i>        | <b>46.68 <math>\pm</math> 9.42</b> | <b>22.76 <math>\pm</math> 15.37</b> | 0.49                 | 0.015           |
| <i>Firmicutes</i>      | unknown genus in family<br><i>Erysipelotrichaceae</i> | 0.10 $\pm$ 0.08                    | <b>1.07 <math>\pm</math> 0.83</b>   | <b><u>10.87</u></b>  | 0.009           |
| <i>Proteobacteria</i>  | unknown genus in family<br><i>Enterobacteriaceae</i>  | BLD                                | 0.92 $\pm$ 1.15                     | 919.86               | 0.003           |

Bacterial alteration by BTS administration for 2 weeks was investigated. See method in Table S3.

**Table S5.** Relative abundance of microbiota (genus level) in ob/ob mice (three weeks on dietary administration of 5% BTS).

| Phylum                 | Genus                                                 | CONT group (%)<br>Mean $\pm$ SD    | BTS group (%)<br>Mean $\pm$ SD      | Ratio                | <i>p</i> -value |
|------------------------|-------------------------------------------------------|------------------------------------|-------------------------------------|----------------------|-----------------|
| <i>Verrucomicrobia</i> | <i>Akkermansia</i>                                    | 0.08 $\pm$ 0.12                    | <b>3.41 <math>\pm</math> 2.68</b>   | <b><u>40.51</u></b>  | 0.034           |
|                        | <i>Bacteroides</i>                                    | 0.66 $\pm$ 0.25                    | <b>11.50 <math>\pm</math> 5.83</b>  | <b><u>17.32</u></b>  | 0.002           |
| <i>Bacteroidetes</i>   | <i>Parabacteroides</i>                                | <b>4.65 <math>\pm</math> 2.42</b>  | <b>14.86 <math>\pm</math> 4.81</b>  | 3.20                 | 0.004           |
|                        | <i>Prevotella</i>                                     | <b>4.86 <math>\pm</math> 1.82</b>  | <b>1.50 <math>\pm</math> 0.43</b>   | 0.31                 | 0.002           |
| <i>Firmicutes</i>      | unknown genus in order<br><i>Clostridiales</i>        | <b>47.35 <math>\pm</math> 4.14</b> | <b>19.28 <math>\pm</math> 11.92</b> | 0.41                 | 0.002           |
|                        | unknown genus in family<br><i>Erysipelotrichaceae</i> | 0.11 $\pm$ 0.09                    | 0.85 $\pm$ 0.38                     | 8.03                 | 0.002           |
|                        | <i>[Eubacterium]</i>                                  | <0.001                             | 0.20 $\pm$ 0.21                     | 204.38               | 0.010           |
| <i>Proteobacteria</i>  | unknown genus in family<br><i>Enterobacteriaceae</i>  | 0.01 $\pm$ 0.02                    | <b>2.82 <math>\pm</math> 3.79</b>   | <b><u>277.50</u></b> | 0.004           |

Bacterial alteration by BTS administration for 3 weeks was investigated. See method in Table S3.

**Table S6.** Relative abundance of microbiota (genus level) in ob/ob mice (four weeks on dietary administration of 5% BTS).

| Phylum                | Genus                                                | CONT group (%)<br>Mean ± SD | BTS group (%)<br>Mean ± SD | Ratio         | p-value |
|-----------------------|------------------------------------------------------|-----------------------------|----------------------------|---------------|---------|
| <i>Actinobacteria</i> | <i>Bifidobacterium</i>                               | <0.001                      | 0.10 ± 0.10                | 98.29         | 0.010   |
|                       | <i>Bacteroides</i>                                   | 0.63 ± 0.38                 | <b>12.38 ± 8.81</b>        | <b>19.72</b>  | 0.002   |
| <i>Bacteroidetes</i>  | <i>Parabacteroides</i>                               | <b>4.68 ± 3.09</b>          | <b>16.31 ± 6.38</b>        | 3.48          | 0.015   |
|                       | <i>Prevotella</i>                                    | <b>4.59 ± 2.89</b>          | <b>2.05 ± 1.65</b>         | 0.45          | 0.041   |
|                       | [ <i>Prevotella</i> ]                                | <0.001                      | 0.79 ± 0.84                | 789.80        | 0.028   |
| <i>Firmicutes</i>     | unknown genus in family                              | 0.10 ± 0.10                 | 0.90 ± 0.56                | 8.84          | 0.004   |
|                       | <i>Erysipelotrichaceae</i> (2)                       |                             |                            |               |         |
|                       | [ <i>Eubacterium</i> ]                               | <0.001                      | 0.09 ± 0.07                | 90.73         | 0.010   |
| <i>Proteobacteria</i> | unknown genus in family<br><i>Enterobacteriaceae</i> | 0.03 ± 0.04                 | <b>3.46 ± 5.17</b>         | <b>129.49</b> | 0.028   |

Bacterial alteration by BTS administration for 4 weeks was investigated. See method in Table S3.

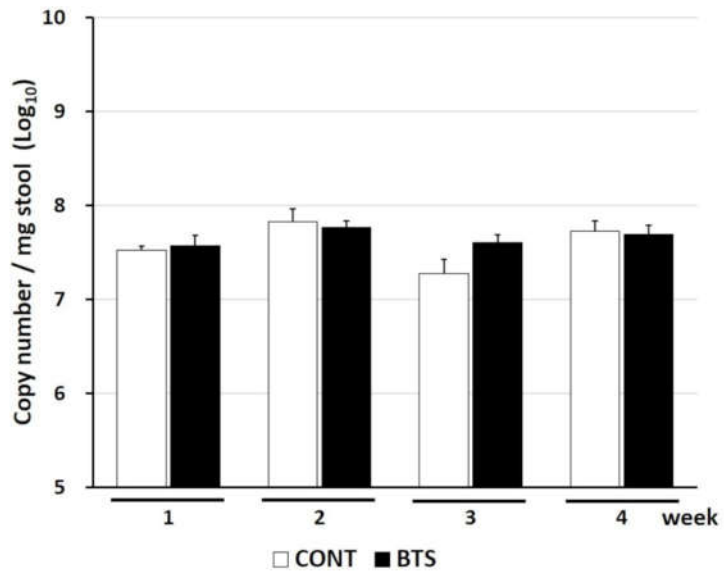

**Figure S1.** Copy number of 16S rRNA gene in stool samples.

DNA in stool samples was extracted and the copy number of rRNA gene was quantified by qPCR. The Universal primer used to detect all bacteria is described in Materials and Methods. Data are shown as mean  $\pm$  SE ( $n = 6$ ).
